# Supplementary material
Source: PubMed Central journal article supplement (PMC4216143)
Supplement: NIHMS60313-supplement-Supplementary_Figures_1-2.pdf [file NIHMS60313-supplement-Supplementary_Figures_1-2.pdf]

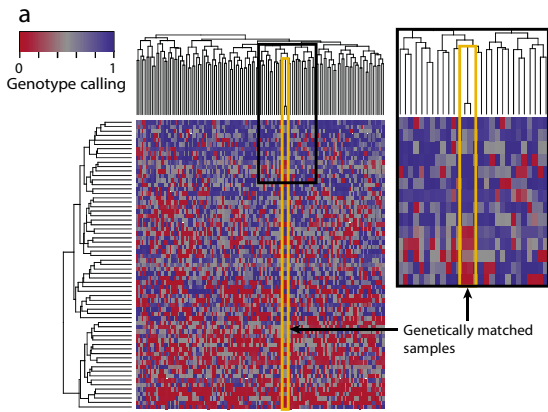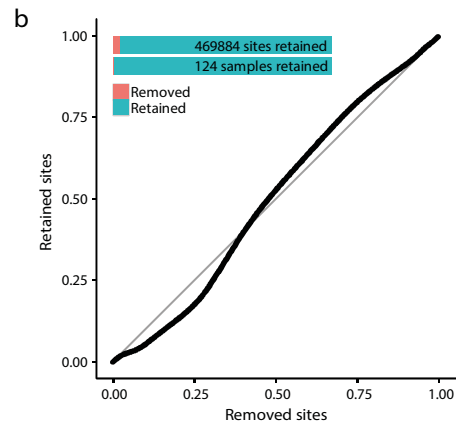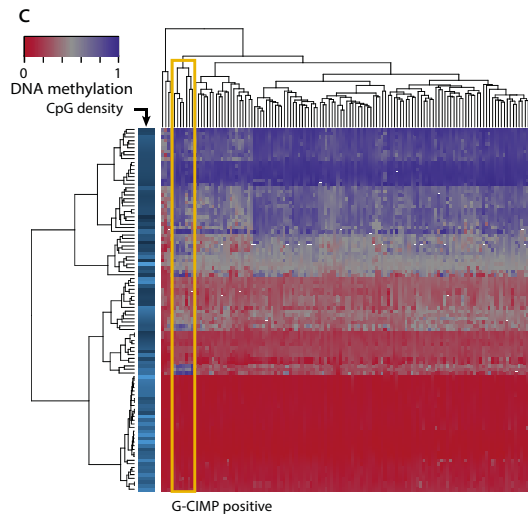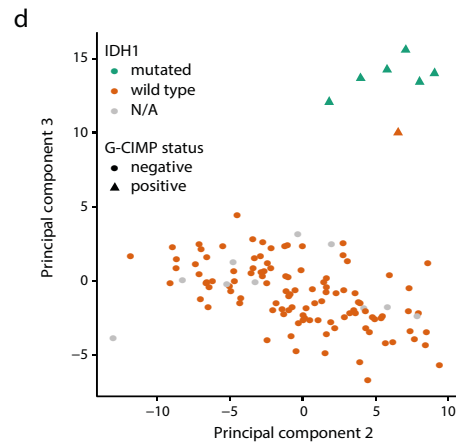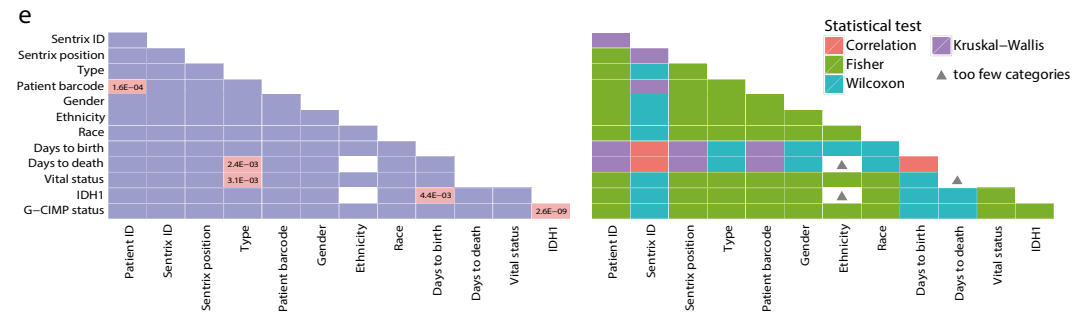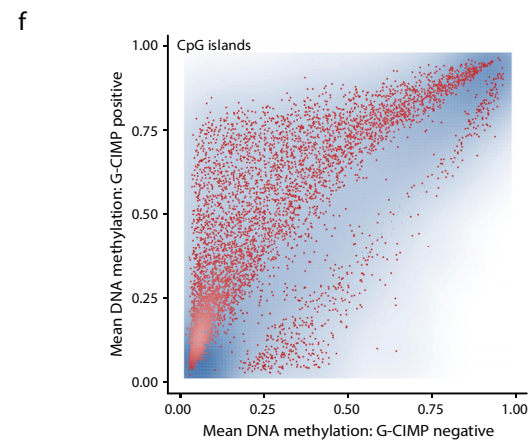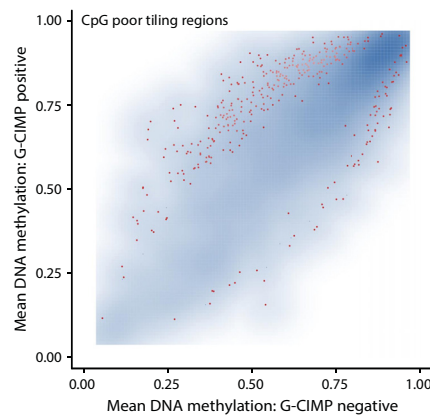

## Supplementary Figure 1

### Analysis of DNA methylation in a cancer cohort based on Infinium 450K data.

RnBeads was used to rediscover a clinically distinct subgroup of glioblastoma patients characterized by increased DNA methylation levels (termed G-CIMP+), and to predict the G-CIMP status for a total of 124 patients using Infinium 450k data obtained from the TCGA project (<http://cancergenome.nih.gov>).

(a) Detection of genetic duplicates among the patient samples (columns) using a clustered heatmap of intensity values for the genotyping probes that are present on the Infinium microarray (rows). The inset shows that two samples exhibit a high level of genetic identity, and they are indeed derived from tumors of the same patient.

(b) Quality control plot summarizing the outcome of the data filtering. The bar plots on the top left show that the majority of CpG sites (top) and samples (bottom) are of good quality and can be retained. The relatively straight line in the quantile-quantile plot indicates that the probe filtering does not have a major impact on the distribution of DNA methylation in the dataset.

(c) Identification of a small but clearly distinguished cluster of G-CIMP+ glioblastoma samples with elevated DNA methylation levels especially in CpG-rich genomic regions (light blue in the leftmost column). In the heatmap, blue colors denote high levels of DNA methylation, red indicates low levels and grey represents intermediate levels. For visualization purposes, only the 100 gene promoters (rows) with the highest levels of inter-sample variation in DNA methylation are shown (columns), but the hierarchical clustering is based on the full set of promoters.

(d) Global assessment of the similarity between the DNA methylation profiles, plotting all glioblastoma samples according to their second and third principal components. The samples exhibit strong separation according to the G-CIMP status (denoted by point shape) and IDH1 mutation status (denoted by point color).

(e) Analysis of significant associations between all user-provided sample annotations. Significant p-values (<0.05) are highlighted in the left triangle, and the corresponding statistical tests are annotated in the right triangle (orange: Pearson correlation followed by permutation-based estimation of the p-value; green: Fisher's exact test; blue: Wilcoxon rank sum test; violet: Kruskal-Wallis one-way analysis of variance).

(f) Genome-scale comparison between the DNA methylation levels of G-CIMP positive (y-axis) and G-CIMP negative (x-axis) tumor samples, focusing on CpG islands (left scatterplot) and on 5-kilobase tiling regions with a CpG content in the bottom quartile (right scatterplot), respectively. Genomic regions that are differentially methylated with an FDR below 0.05 are presented as red points. All other regions are displayed in blue, and color brightness denotes point density.

## RnBeads

### Methylome Resource: Comprehensive RnBeads analyses of large-scale reference epigenome datasets

The Methylome Resource was established by applying RnBeads to some of the largest public datasets that are currently available for whole genome bisulfite sequencing (WGBS), for reduced representation bisulfite sequencing (RRBS) and for the Illumina Infinium HumanMethylation450 assay. This resource provides a reference for large-scale DNA methylation analyses that can be used in complementary ways:

- Researchers can browse the reports online, explore biological hypotheses and load relevant data points for visual inspection or custom data analysis into R or into other software tools. For instance, using the links from the "Data Export" reports, the tracks can be visualized in various Genome Browsers.
  - ↳ To explore the Methylome Resource, please click any of the "View analysis report" links below.
- Researchers can download the data and configuration files, add their own DNA methylation data and then run RnBeads in order to analyze their data in the context of methylome datasets that span a broad set of tissue types.
  - ↳ To rerun the Methylome Resource analyses, please download the data and configuration files from the table below. Each dataset can either run in full or using a representative subset of samples to reduce runtime. A more detailed explanation on how to run these analyses is available on the [FAQ](#) page.

| Resource                                              | Data Source                             | Preprocessed Data Archive        | Sample Annotation Files                                         | RnBeads Configuration        |
|-------------------------------------------------------|-----------------------------------------|----------------------------------|-----------------------------------------------------------------|------------------------------|
| Genome-scale RRBS data for 216 tissues and cell lines | <a href="#">Encode Project Website</a>  | <a href="#">data.zip</a> (3 GB)  | <a href="#">samples.csv</a> (all samples)                       | <a href="#">analysis.xml</a> |
|                                                       |                                         |                                  | <a href="#">samples.csv</a> (17 untreated samples)              |                              |
| Genome-wide WGBS data for 41 tissues and cell lines   | <a href="#">Gene Expression Omnibus</a> | <a href="#">data.zip</a> (11 GB) | <a href="#">samples.csv</a> (all 41 samples)                    | <a href="#">analysis.xml</a> |
|                                                       |                                         |                                  | <a href="#">samples.csv</a> (10 adult primary tissues)          |                              |
| Infinium 450k data for 4034 cancer and normal samples | <a href="#">TCGA data portal</a>        | <a href="#">data.zip</a> (35 GB) | <a href="#">samples.csv</a> (all samples)                       | <a href="#">analysis.xml</a> |
|                                                       |                                         |                                  | <a href="#">samples.csv</a> (40 samples from 10 primary tumors) |                              |

#### Resource 1: Genome-scale RRBS data for 216 tissues and cell lines

In the context of the [ENCODE](#) project, [Varley et al.](#) established genome-scale DNA methylation maps for various tissue sample and cell lines using reduced representation bisulfite sequencing (RRBS). This RnBeads analysis of 216 samples shows that cells from different germ layers are clearly distinguished by their DNA methylation profiles, and it identifies characteristic loci that can be used for classifying samples according to their tissue type. Including parts or all of this dataset in custom RnBeads analyses provides a useful reference for quality control, analysis and interpretation of user-generated DNA methylation datasets.

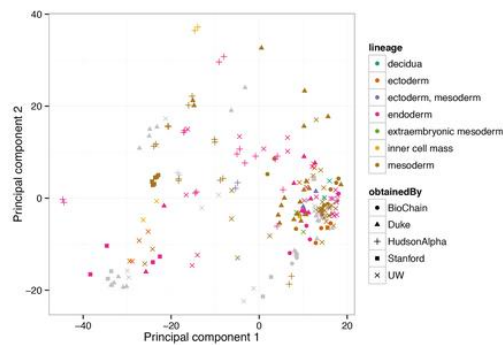

[View analysis reports](#)

## Supplementary Figure 2

### RnBeads-based Methylome Resource of reference epigenome data sets.

Screenshot of the Methylome Resource (<http://rnbeads.mpi-inf.mpg.de/methylomes.php>), which makes large DNA methylation datasets more readily available for follow-up research. On the one hand, it provides detailed analysis reports for publicly available methylome datasets that can be explored interactively. On the other hand, the Methylome Resource website lets RnBeads users download all data and configurations that are needed to re-run all or part of the DNA methylation analyses in their local or cloud-based computing environment. These re-runnable analysis configurations make it straightforward for RnBeads users to analyze their own DNA methylation data in the context of publicly available reference epigenome maps.
